# Supplementary material for: Transmission of Soil Transmitted Helminthiasis in the Mifi Health District (West Region, Cameroon): Low Endemicity but Still Prevailing Risk
Source: MDPI journal article supplement (doi:10.3390/parasitologia1030011), 2021-06-24
Supplement: s1 [file s1]

Archive with 1 entries (1 files):
- parasitologia-1234973-supplementary.pdf
