# Supplementary material for: Transmission of Soil Transmitted Helminthiasis in the Mifi Health District (West Region, Cameroon): Low Endemicity but Still Prevailing Risk
Source: MDPI journal article supplement (doi:10.3390/parasitologia1030011), 2021-06-24
Supplement: s1 [file s1 › parasitologia-1234973-supplementary.pdf]

**Table S1** Number of communities and population of each Health Areas of the Mifi Health District

| Health Area                 | Clusters | N Communities | Population     |
|-----------------------------|----------|---------------|----------------|
| Bapi*                       | North    | 19            | 4,148          |
| Baye                        | North    | 11            | 2,559          |
| Djietcha                    | North    | 10            | 7,175          |
| Tchada                      | North    | 8             | 3,918          |
| Badiembou*                  | South    | 9             | 15,957         |
| Djunang                     | South    | 5             | 4,044          |
| King Place                  | South    | 9             | 61,222         |
| Toket                       | South    | 5             | 9,121          |
| Batoukop                    | East     | 10            | 9,990          |
| Famtchouet*                 | East     | 5             | 4,222          |
| Yagou                       | East     | 8             | 14,108         |
| Kamkop                      | West     | 8             | 26,431         |
| Keuleu                      | West     | 6             | 3,495          |
| Kongso*                     | West     | 16            | 8,397          |
| Wouong                      | West     | 6             | 4,360          |
| Djeleng*                    | Centre   | 13            | 60,145         |
| Famla                       | Centre   | 11            | 36,098         |
| Kouougouo                   | Centre   | 8             | 18,258         |
| Lafe                        | Centre   | 8             | 24,115         |
| Tyo                         | Centre   | 13            | 44,379         |
| <b>Mifi Health District</b> |          | <b>188</b>    | <b>362,142</b> |

\* Health Area were organized into clusters prior random selection
